# Supplementary material for: Lake Avernus Has Turned Red: Bioindicator Monitoring Unveils the Secrets of “Gates of Hades”
Source: MDPI journal article supplement (doi:10.3390/toxins15120698), 2023-12-13
Supplement: s1 [file s1]

---

*Supplementary Material*

## **Lake Avernus Has Turned Red: Bioindicator Monitoring Unveils the Secrets of “Gates of Hades”**

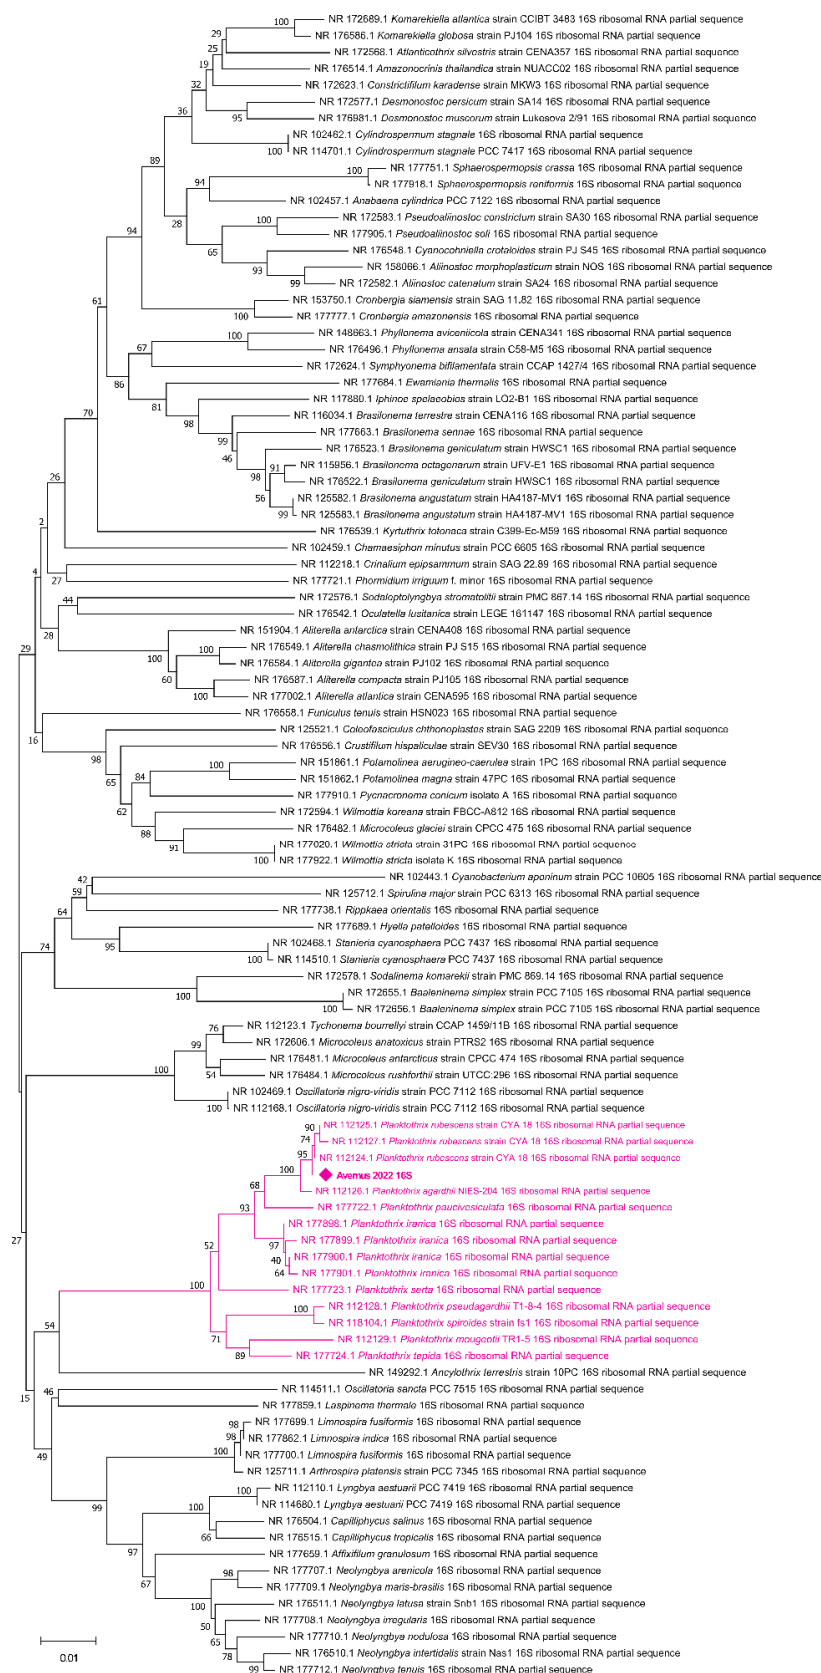

**Figure S1.** 16S rRNA gene neighbor-joining phylogenetic tree displaying the taxonomy of the cyanobacterial community inhabiting 2022 Lake Avernus bloom labeled with diamond (♦). Bootstrap values are given at nodes. Scale-bar represents the phylogenetic distance related to the number of nucleotide substitutions per site.

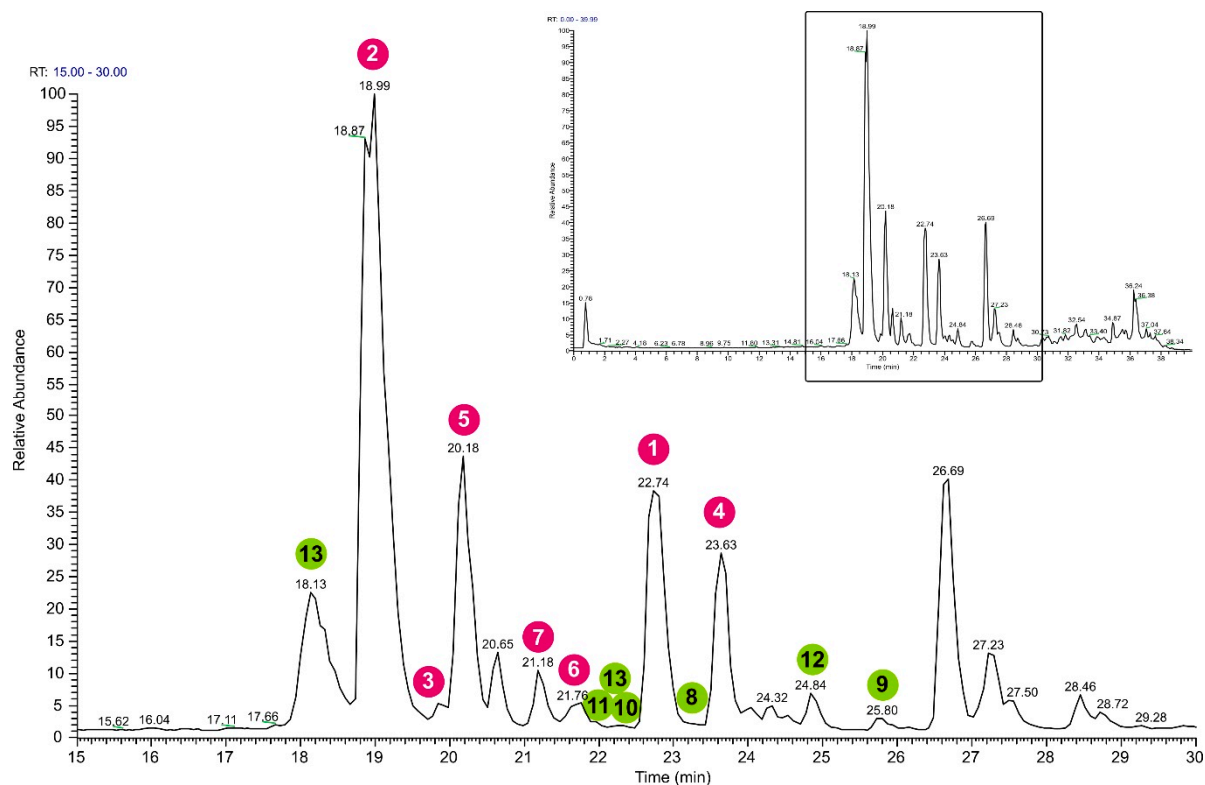

**Figure S2.** LC-HRMS total ion chromatogram (TIC) of the 2022 Lake Avernus bloom MeOH extract. Peak numbers refers to known (purple) and new (green) anabaenopeptin variants.

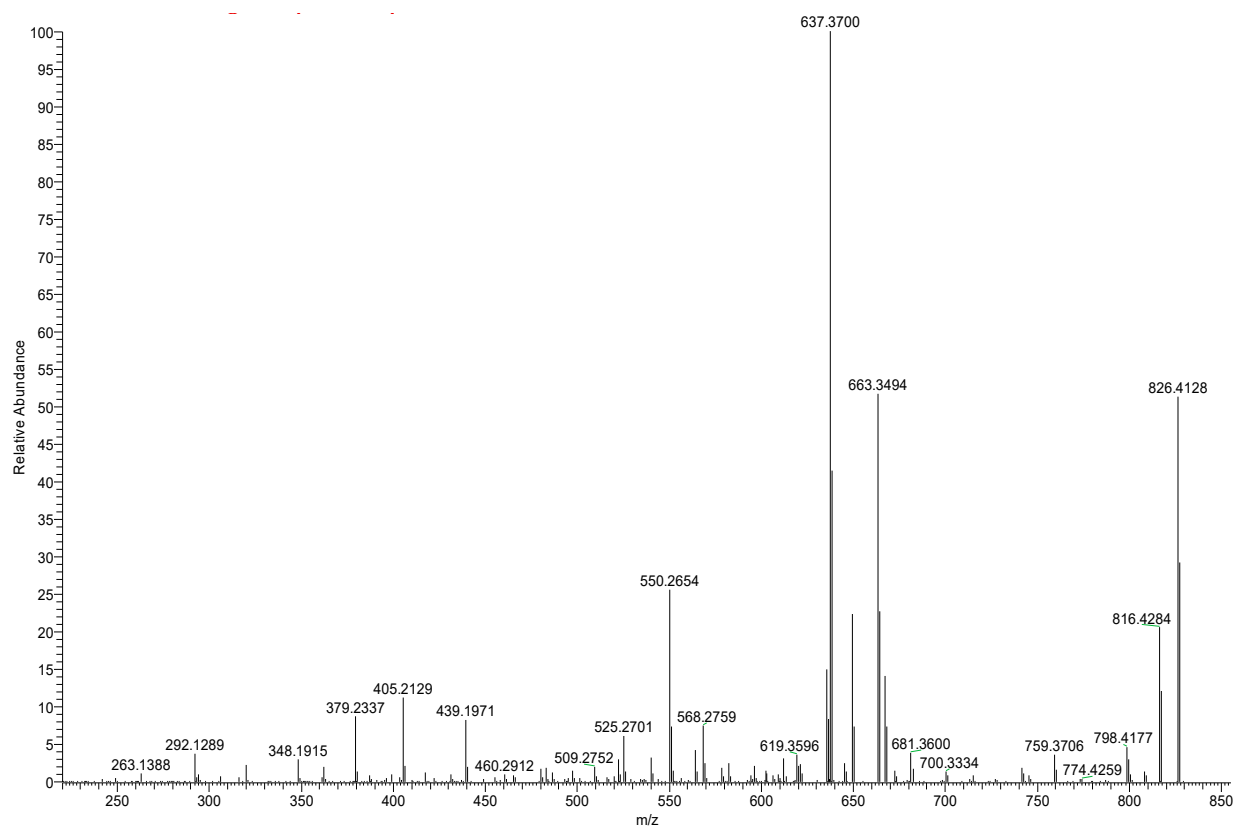

Figure S3. HRMS/MS spectrum of AP-A (1) ( $m/z$  844.4234).

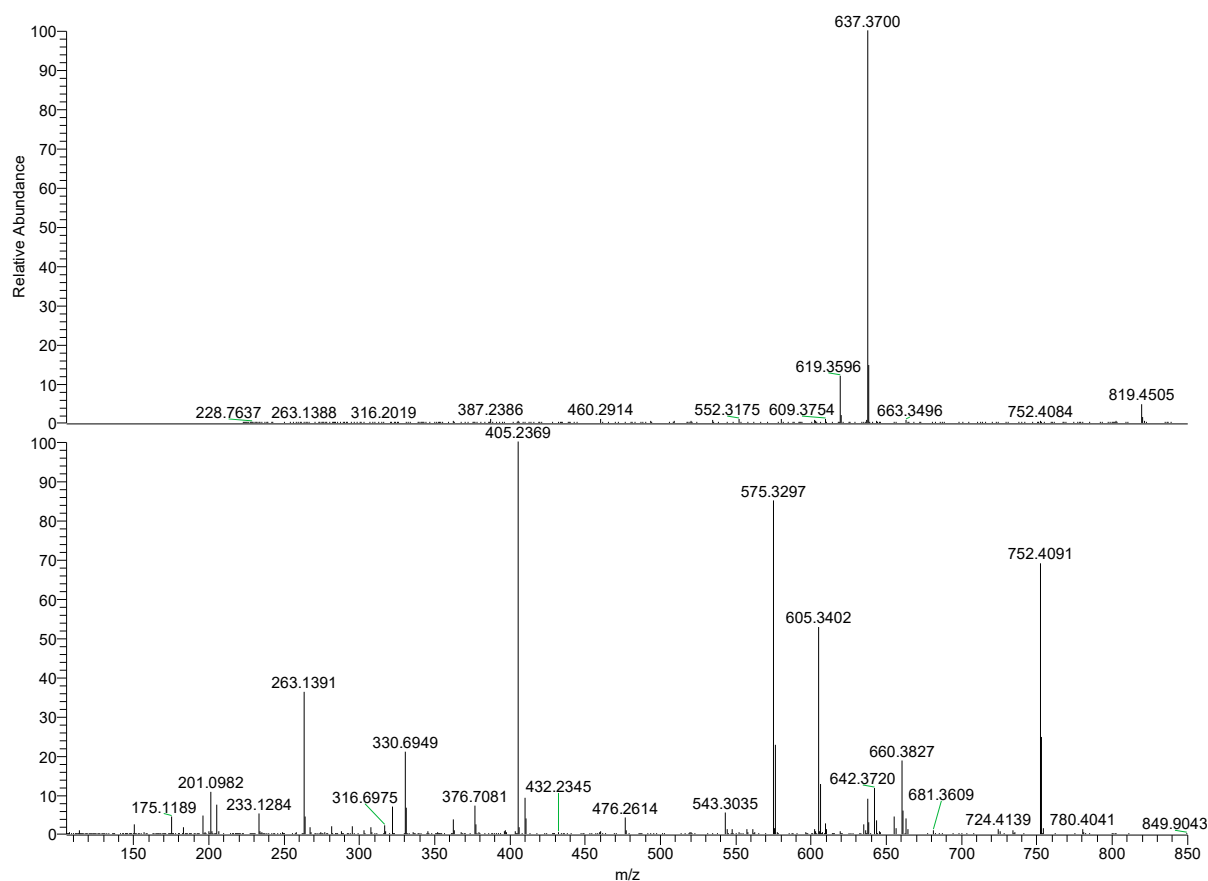

Figure S4. HRMS/MS spectrum of AP-B (2) ( $m/z$  837.4618).

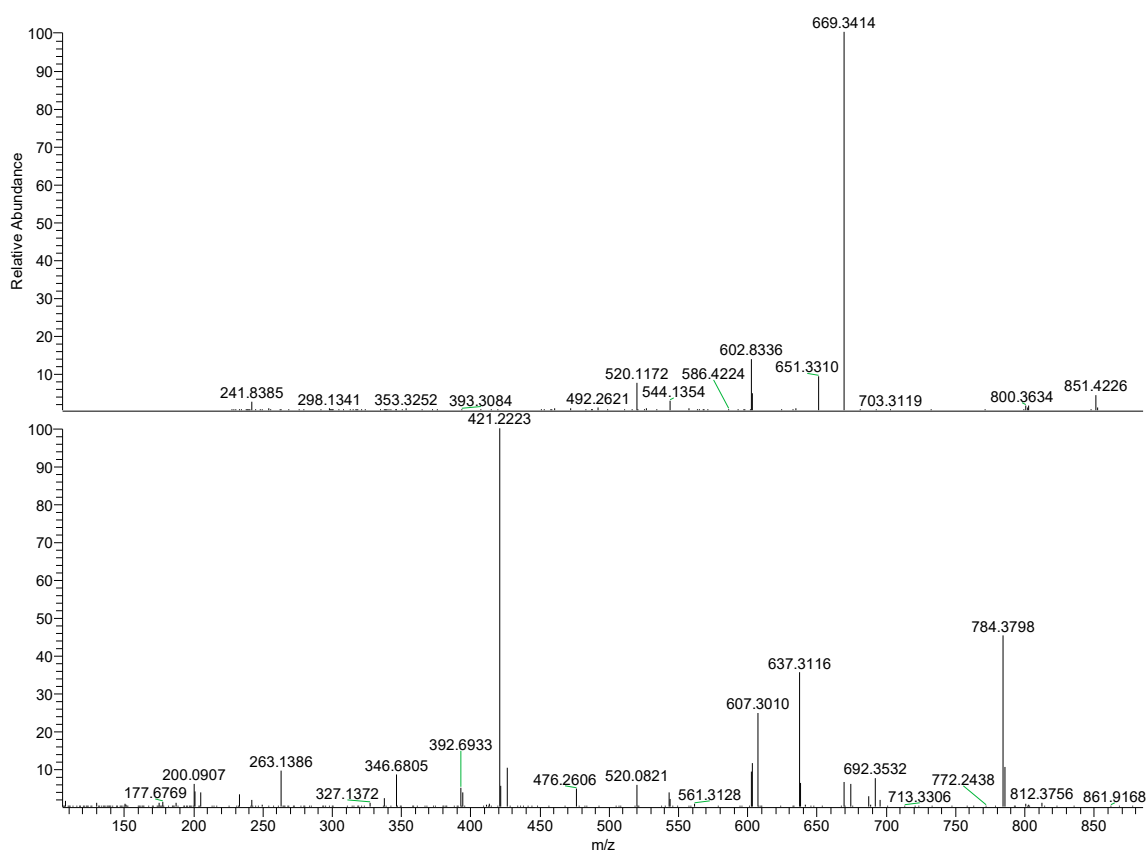

Figure S5. HRMS/MS spectrum of Osc-B (3) ( $m/z$  869.4333).

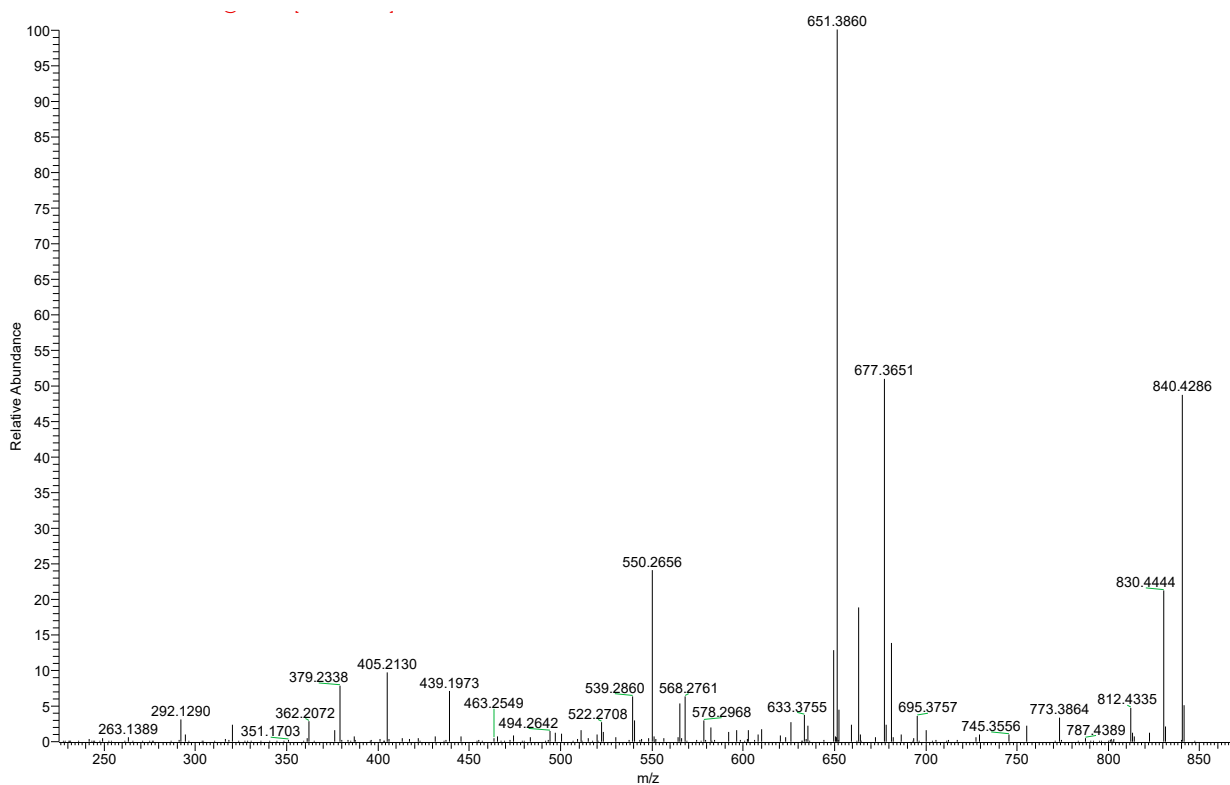

Figure S6. HRMS/MS spectrum of Osc-Y (4) ( $m/z$  858.4393).

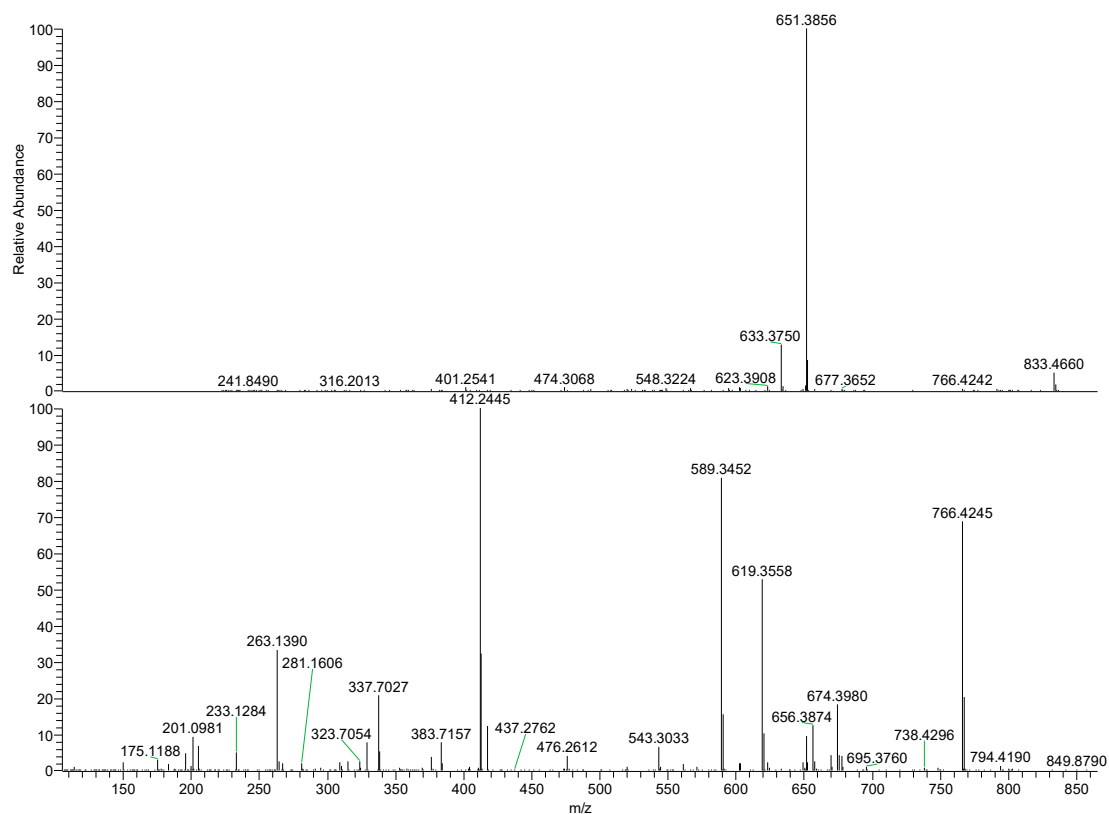

Figure S7. HRMS/MS spectrum of AP-F (5) ( $m/z$  851.4768).

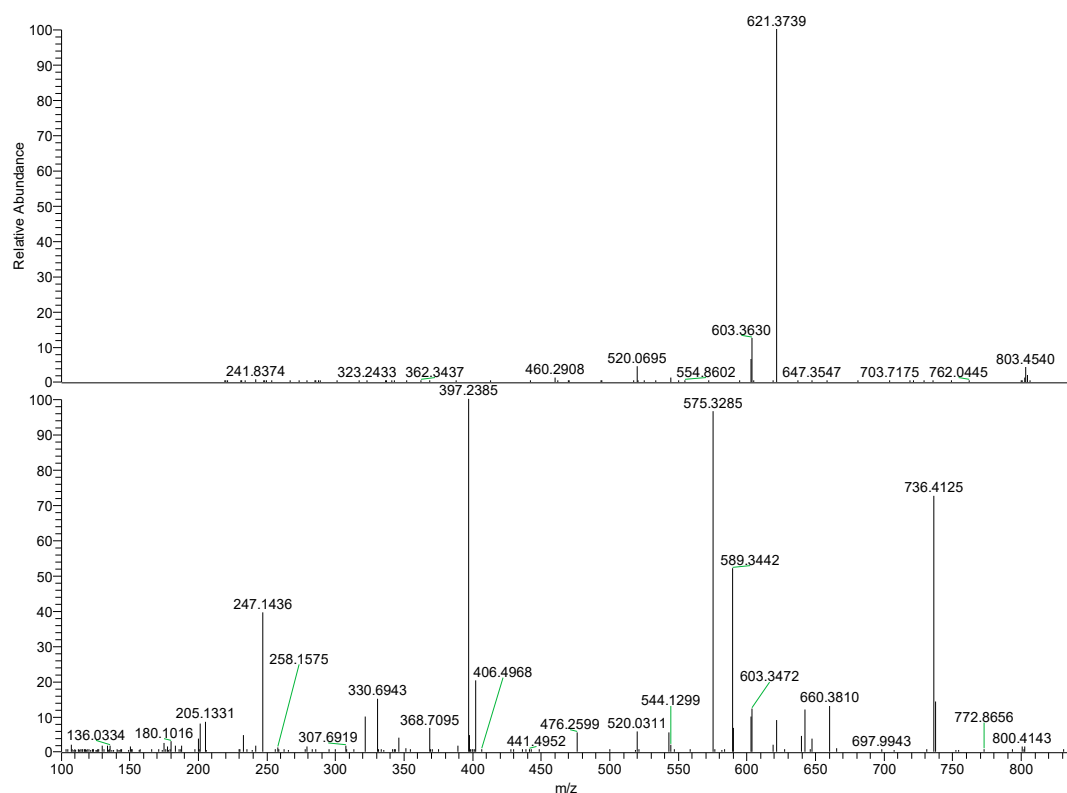

Figure S8. HRMS/MS spectrum of AP-820 (6) ( $m/z$  821.4668).

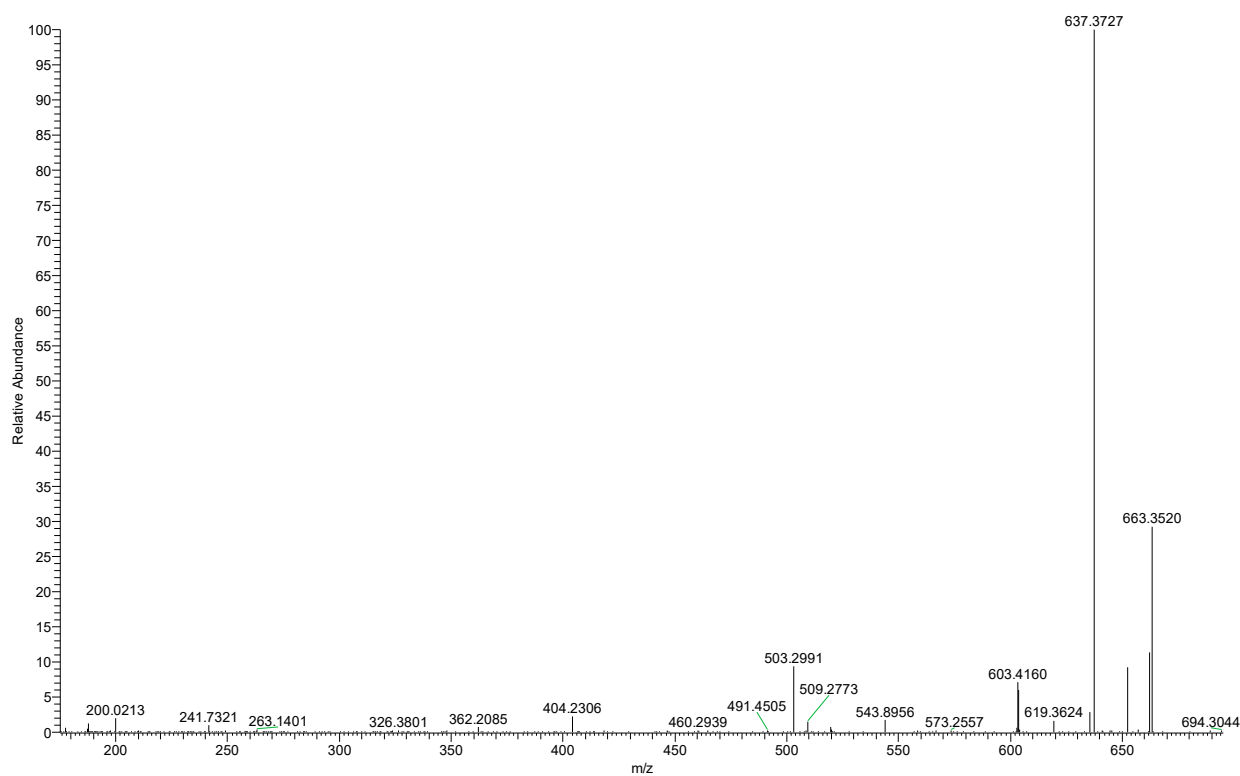

Figure S9. HRMS/MS spectrum of AP-679 (7) ( $m/z$  680.3764).

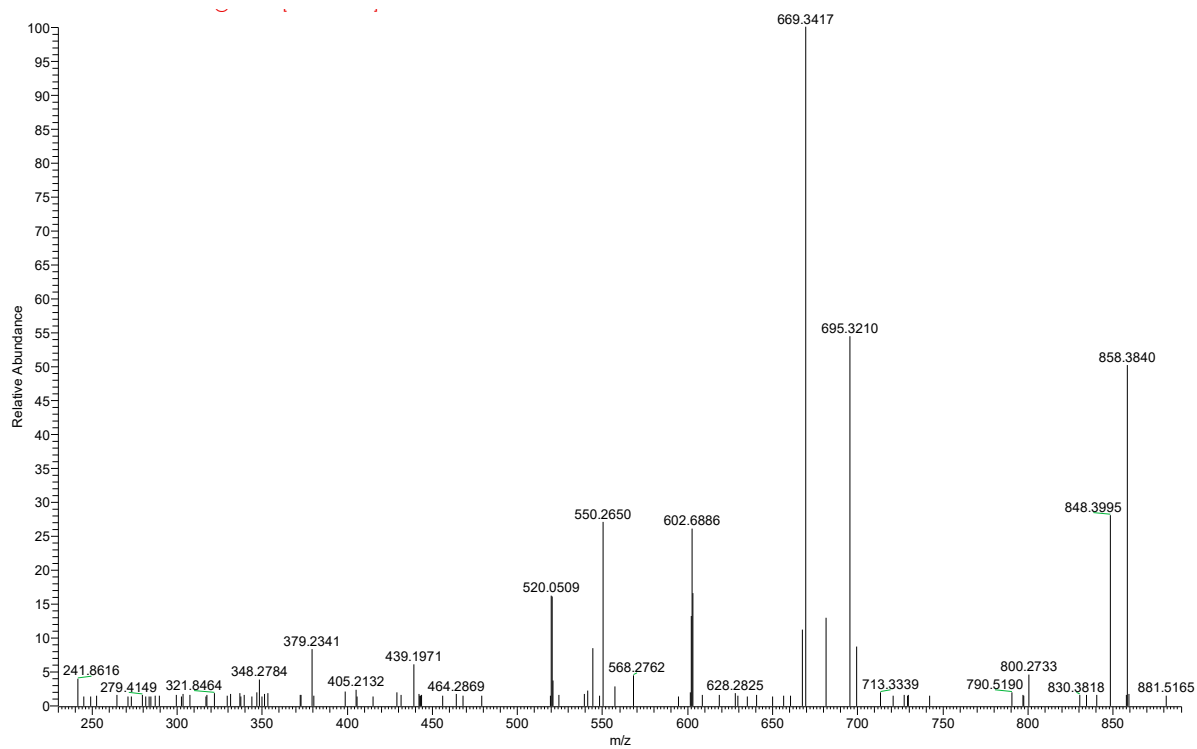

Figure S10. HRMS/MS spectrum of AP-AV875 (8) ( $m/z$  876.3962).

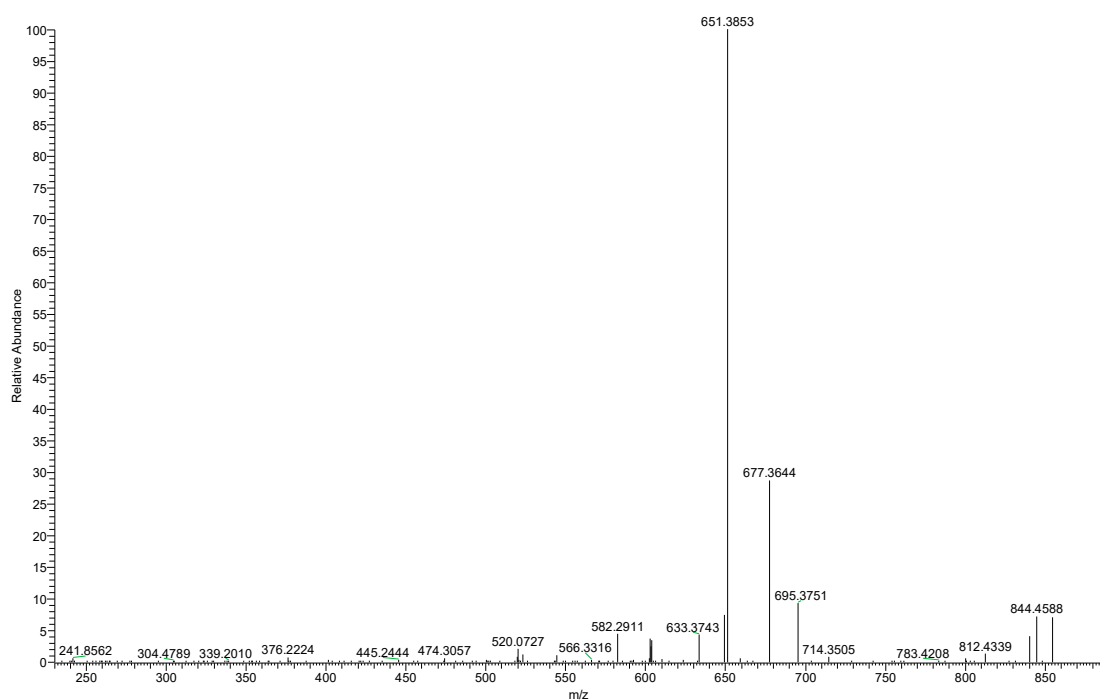

Figure S11. HRMS/MS spectrum of AP-AV871 (9) ( $m/z$  872.4542).

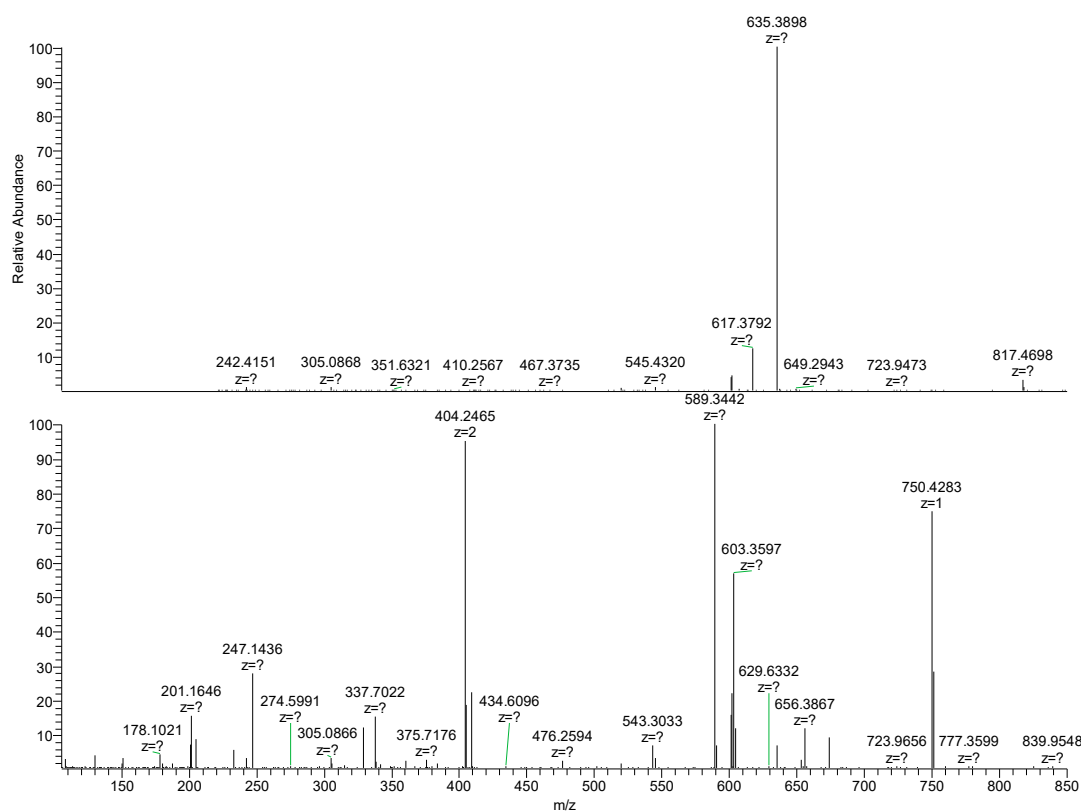

Figure S12. HRMS/MS spectrum of AP-AV834 (10) ( $m/z$  835.4816).



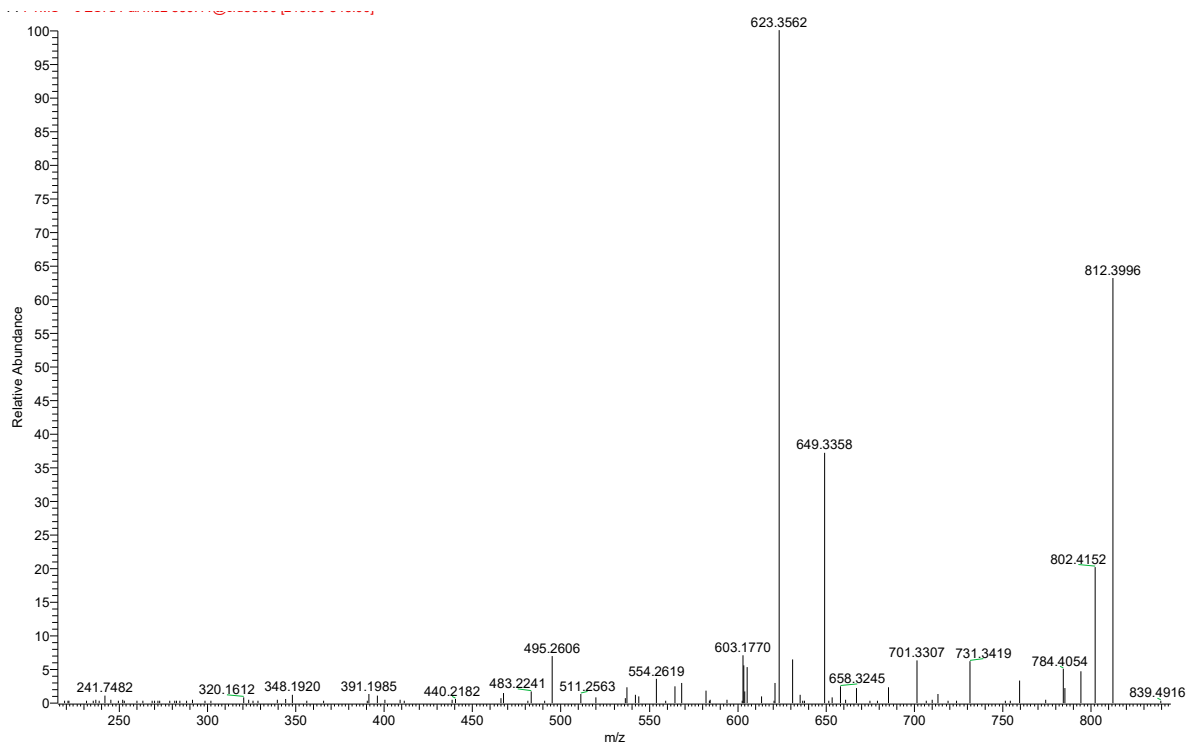

**Figure S13.** HRMS/MS spectrum of AP-AV829 (11) ( $m/z$  830.4081).

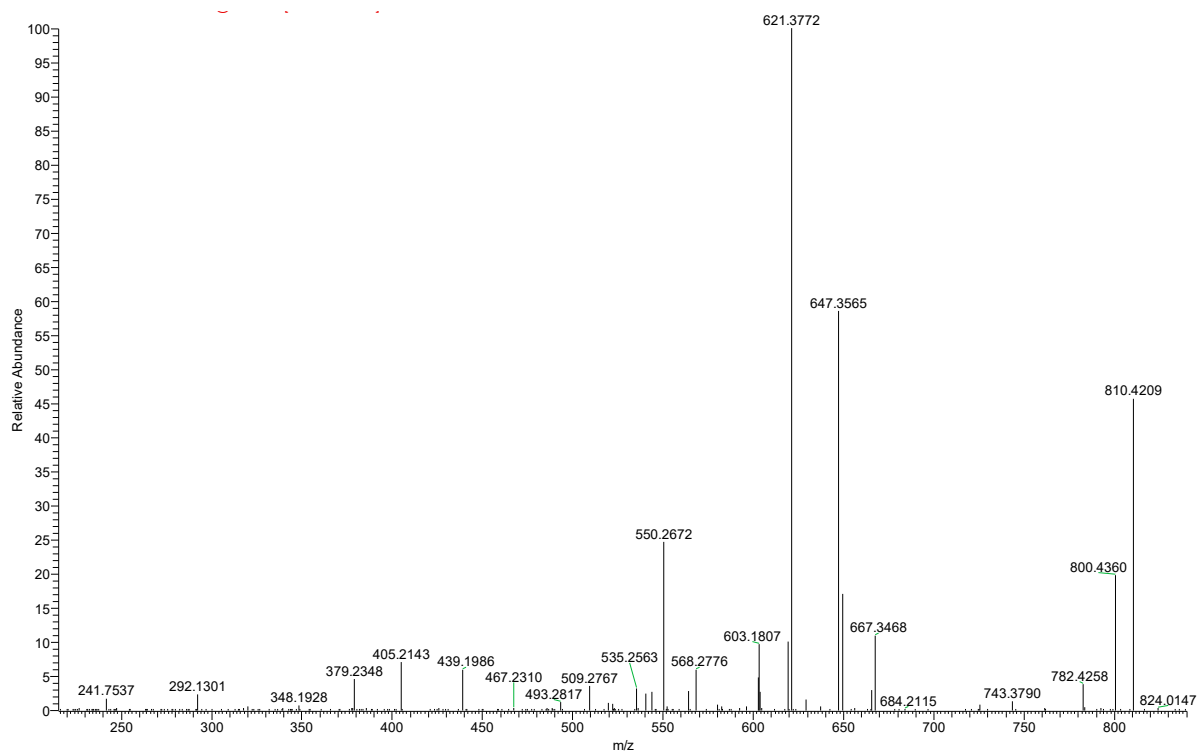

**Figure S14.** HRMS/MS spectrum of AP-AV827 (12) ( $m/z$  828.4289).

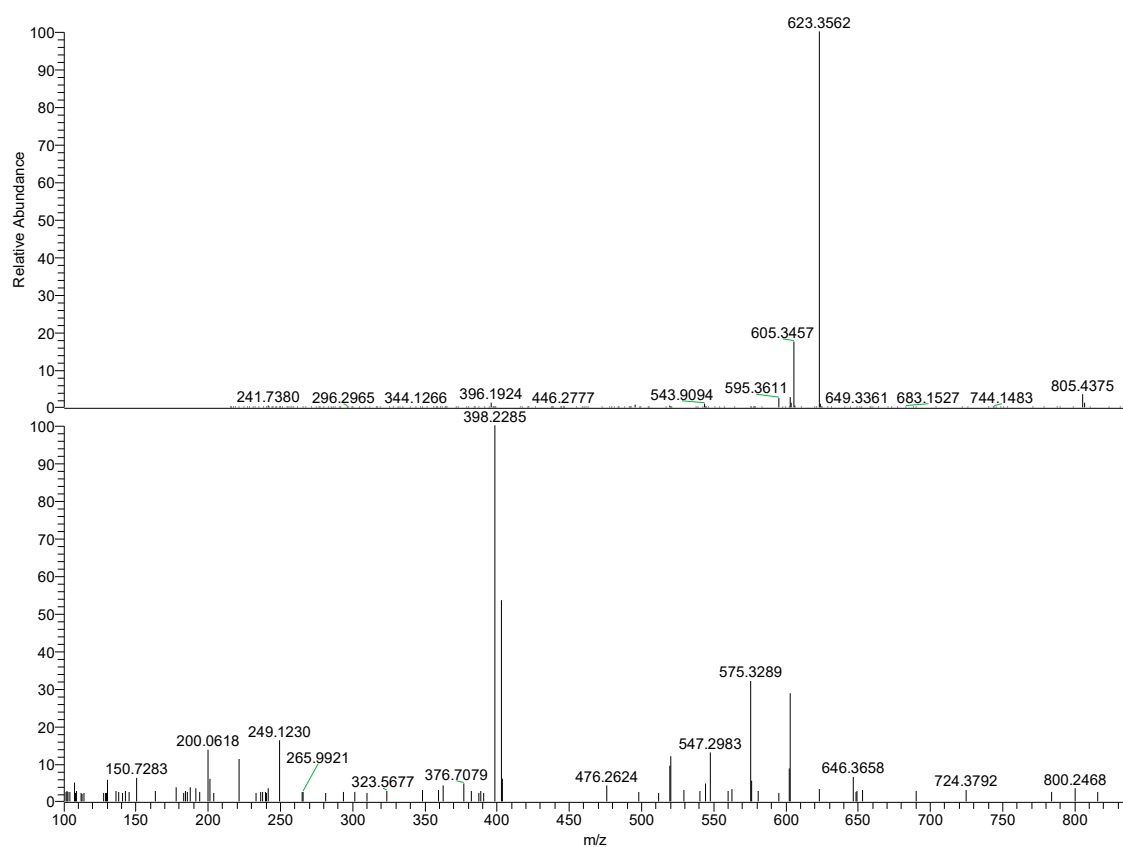

Figure S15. HRMS/MS spectrum of AP-AV822 (13) ( $m/z$  823.4464).

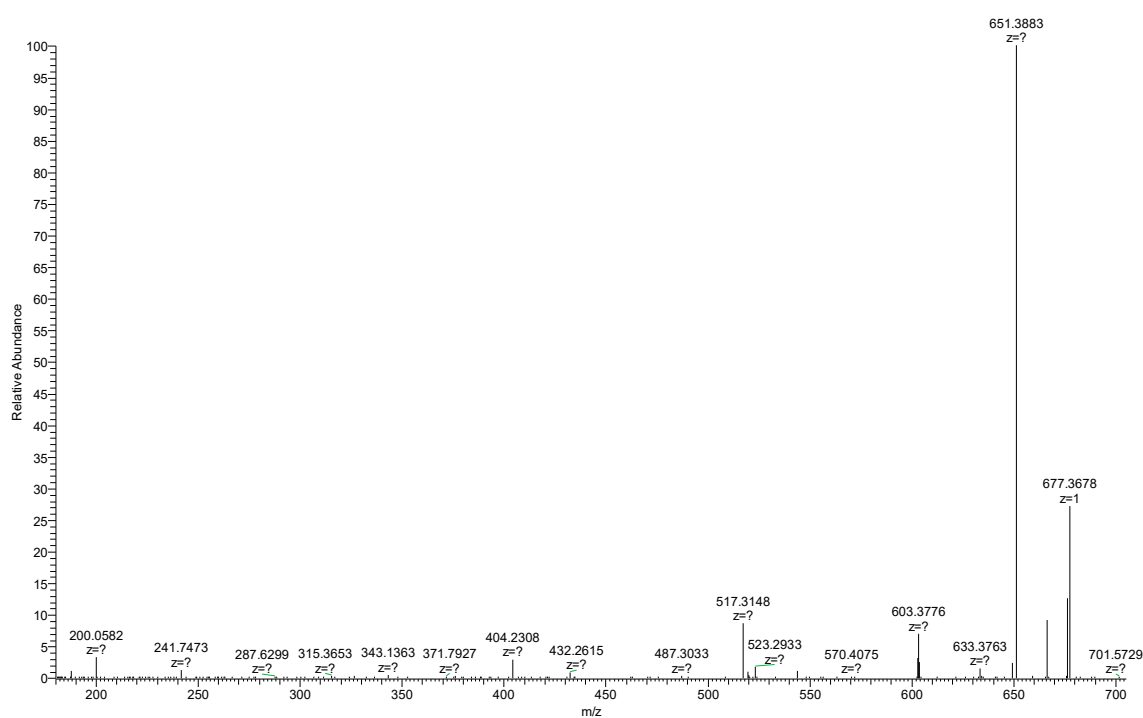

Figure S16. HRMS/MS spectrum of AP-AV693 (14) ( $m/z$  694.4003).

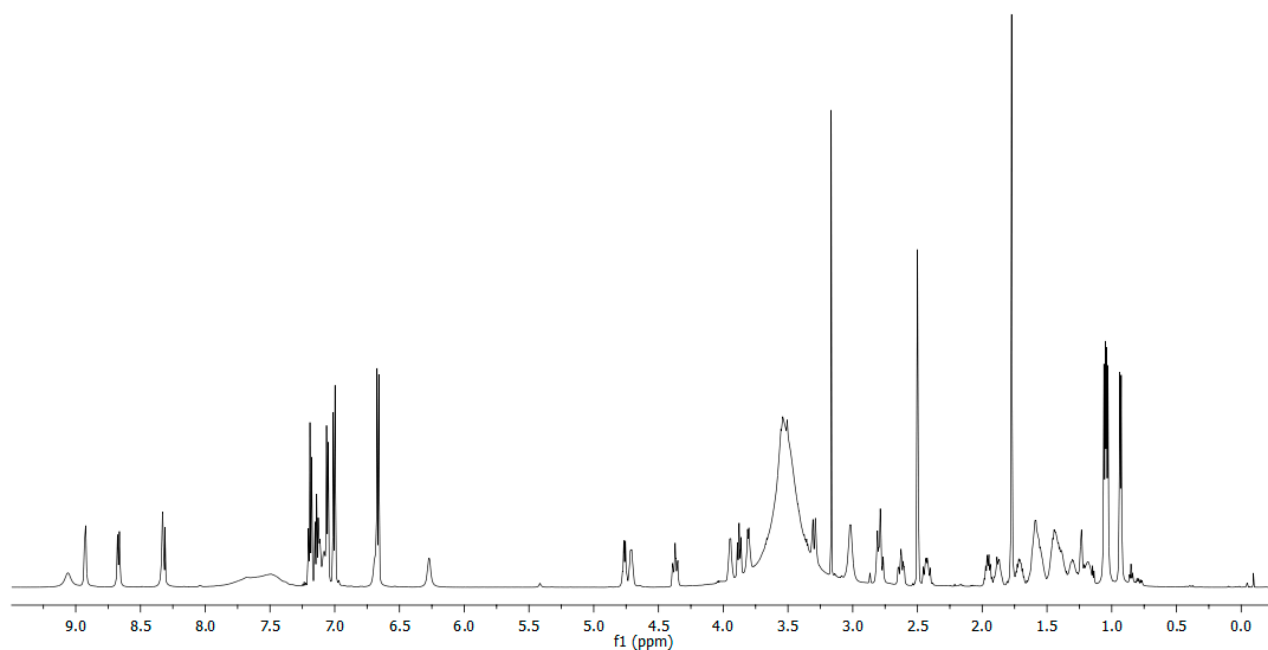

**Figure S17.** <sup>1</sup>H-NMR spectrum of AP-B (2) (700 MHz, DMSO-d<sub>6</sub>).

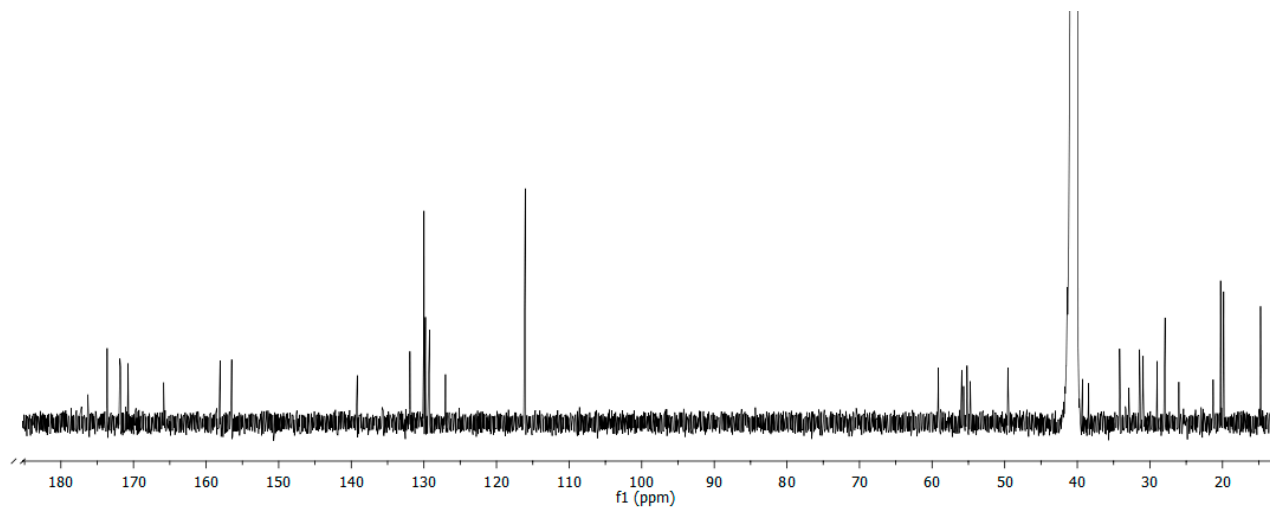

**Figure S18.** <sup>13</sup>C-NMR spectrum of AP-B (2) (700 MHz, DMSO-d<sub>6</sub>).

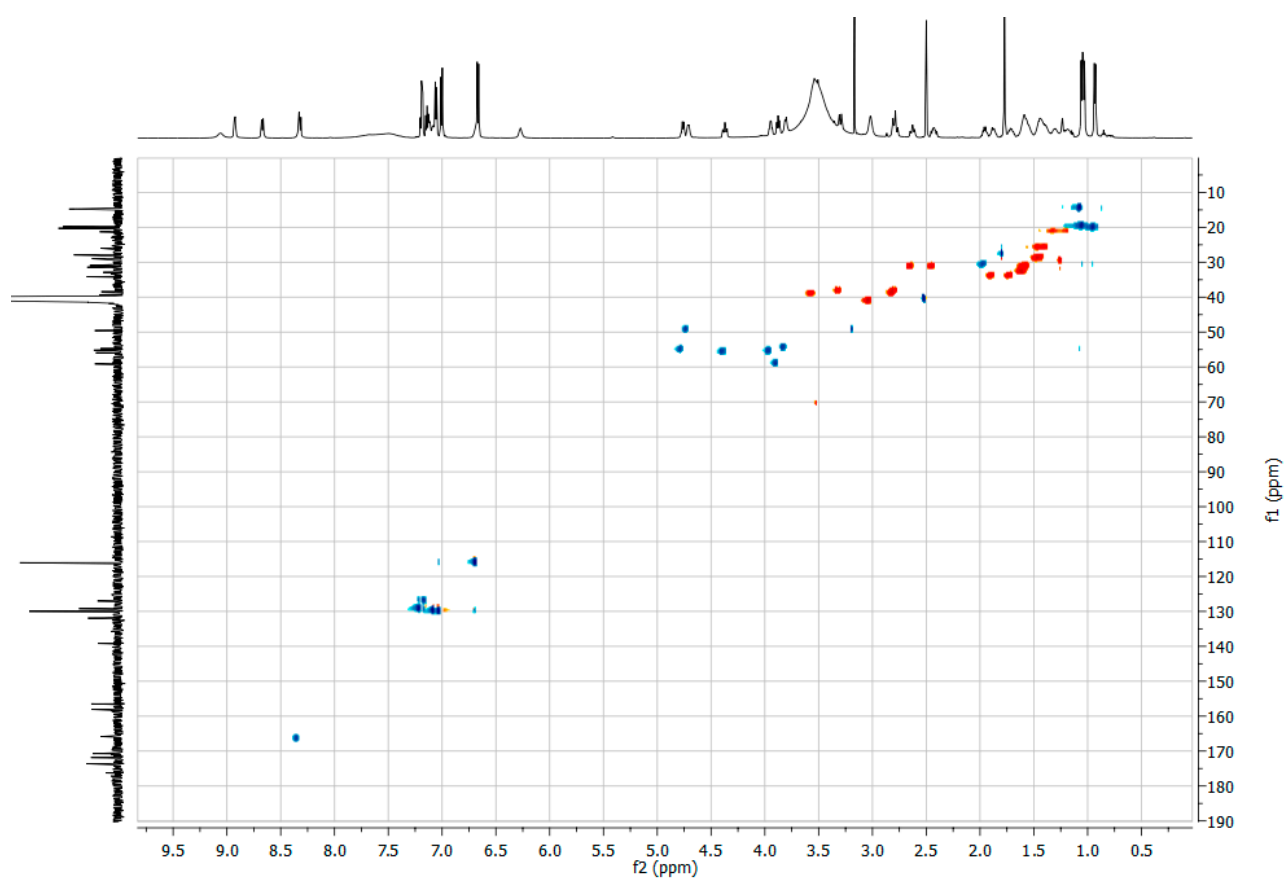

Figure S19. HSQC-NMR spectrum of AP-B (2) (700 MHz, DMSO-d<sub>6</sub>).

**Table S1.** NMR data of AP-B (2) (700 MHz, DMSO-d<sub>6</sub>).

| AA           | pos.       | δ <sub>C</sub> , type | δ <sub>H</sub> , mult (J in Hz)                                |
|--------------|------------|-----------------------|----------------------------------------------------------------|
| <b>Phe</b>   | 1          | 170.7, C              |                                                                |
|              | 2          | 55.9, CH              | 4.41, ddd (12.5, 8.7, 3.2)                                     |
|              | 3          | 38.4, CH <sub>2</sub> | a 3.59, dd (13.2, 3.2)<br>b 2.82, dd (13.2, 12.5)              |
|              | 4          | 139.2, C              |                                                                |
|              | 5, 9       | 129.8, CH             | 7.10, d (7.0)                                                  |
|              | 6, 8       | 129.3, CH             | 7.23, dd (7.4, 7.0)                                            |
|              | 7          | 127.0, CH             | 7.18, m                                                        |
|              | NH*        |                       | 8.71, d (8.7)                                                  |
|              |            |                       |                                                                |
| <b>MeAla</b> | 1          | 165.9, C              |                                                                |
|              | 2          | 55.2, CH              | 4.80, q (6.9)                                                  |
|              | 3          | 14.8, CH <sub>3</sub> | 1.09, d (6.9)                                                  |
|              | N-Me       | 28.0, CH <sub>3</sub> | 1.82, s                                                        |
| <b>Hty</b>   | 1          | 171.8, C              |                                                                |
|              | 2          | 49.5, CH              | 4.75, m                                                        |
|              | 3          | 34.1, CH <sub>2</sub> | a 1.92, m<br>b 1.75, m                                         |
|              | 4          | 31.4, CH <sub>2</sub> | a 2.66, ddd (13.3, 10.7, 3.9)<br>b 2.48, ddd (13.3, 10.7, 6.8) |
|              | 5          | 131.9, C              |                                                                |
|              | 6, 10      | 130.1, CH             | 7.05, d (8.4)                                                  |
|              | 7, 9       | 116.2, CH             | 6.71, d (8.4)                                                  |
|              | 8          | 156.5, C              |                                                                |
|              | NH*        |                       | 8.97, d (4.0)                                                  |
|              | OH*        |                       | 9.11, br s                                                     |
| <b>Val</b>   | 1          | 173.6, C              |                                                                |
|              | 2          | 59.1, CH              | 3.92, t (7.6)                                                  |
|              | 3          | 30.9, CH              | 1.99, m                                                        |
|              | 4          | 20.3, CH <sub>3</sub> | 0.97, d (6.4)                                                  |
|              | 5          | 19.9, CH <sub>3</sub> | 1.08, d (6.6)                                                  |
|              | NH*        |                       | 7.16, d (7.6)                                                  |
| <b>Lys</b>   | 1          | 171.9, C              |                                                                |
|              | 2          | 55.7, CH              | 3.98, dd (11.6, 6.3)                                           |
|              | 3          | 32.9, CH <sub>2</sub> | 1.6, m                                                         |
|              | 4          | 21.3, CH <sub>2</sub> | a 1.34, m<br>b 1.21, m                                         |
|              | 5          | 29.0, CH <sub>2</sub> | 1.48, m                                                        |
|              | 6          | 41.0, CH <sub>2</sub> | 3.07, m                                                        |
|              | α-NH*      |                       | 6.67, d (6.3)                                                  |
|              | ε-NH*      |                       | 7.43, m                                                        |
| <b>Arg</b>   | 1          | 176.3, C              |                                                                |
|              | 2          | 54.7, CH              | 3.8, m                                                         |
|              | 3          | 30.2, CH <sub>2</sub> | 1.58, m                                                        |
|              | 4          | 26.0, CH <sub>2</sub> | a 1.48, m<br>b 1.42, m                                         |
|              | 5          | 41.0, CH <sub>2</sub> | 3.07, m                                                        |
|              | 6          | 158.0, C              |                                                                |
|              | α-NH*      |                       | 6.27, br s                                                     |
|              | δ-NH*      |                       | 7.43, m                                                        |
|              | CO(ureido) | 158.1, C              |                                                                |

\*These signals were attributed by comparison with literature data.
